# Supplementary material for: Amorphous Pterostilbene Delivery Systems Preparation—Innovative Approach to Preparation Optimization
Source: Pharmaceutics. 2023 Apr 13;15(4):1231. doi: 10.3390/pharmaceutics15041231 (PMC10145601; doi:10.3390/pharmaceutics15041231)
Supplement: Supplementary file 1 [file pharmaceutics-15-01231-s001.zip › pharmaceutics-2282946-supplementary.pdf]

Supplementary Materials

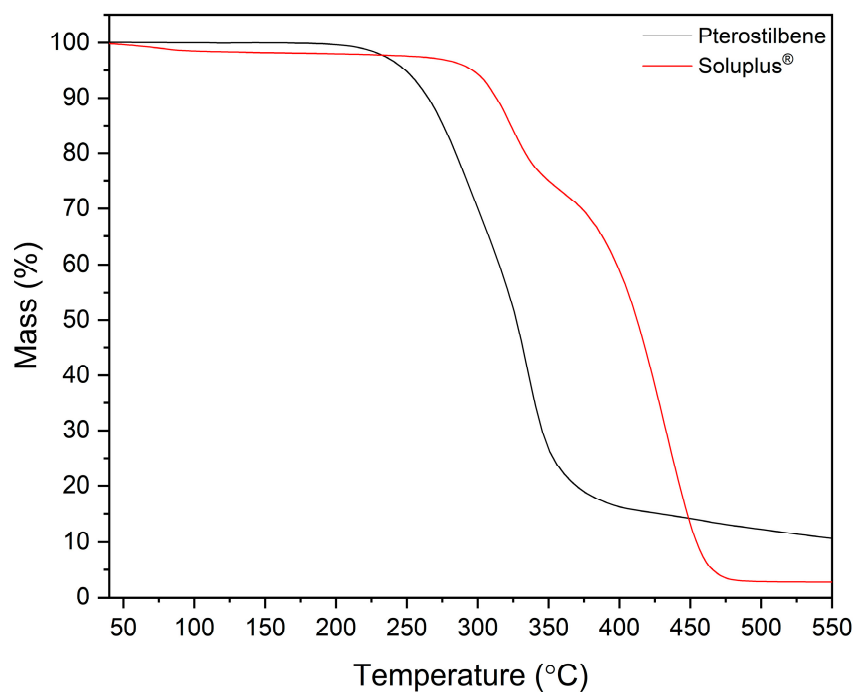

**Figure S1.** TG analysis of pterostilbene and Soluplus®.

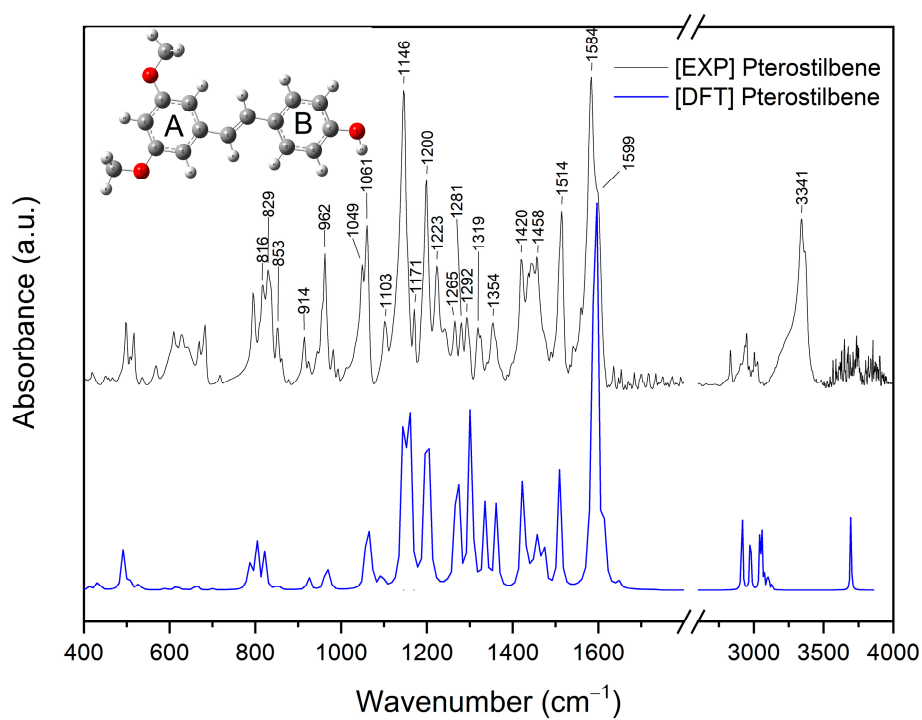

**Figure S2.** Experimental (EXP) and calculation (DFT) IR absorption spectra of pterostilbene at room temperature.

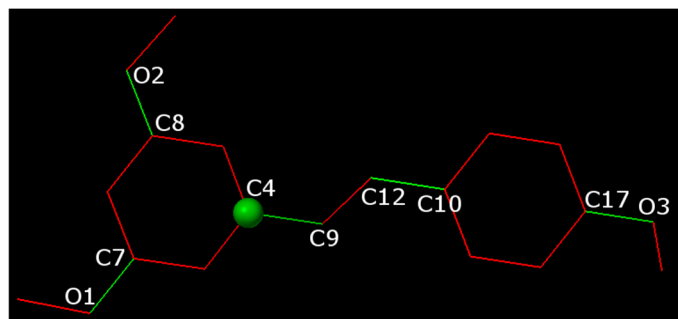

**Figure S3.** Torsion tree of pterostilbene. The “root” of the torsion tree is shown as a green sphere. The rotatable and non-rotatable bonds are shown as a green line and red line, respectively.

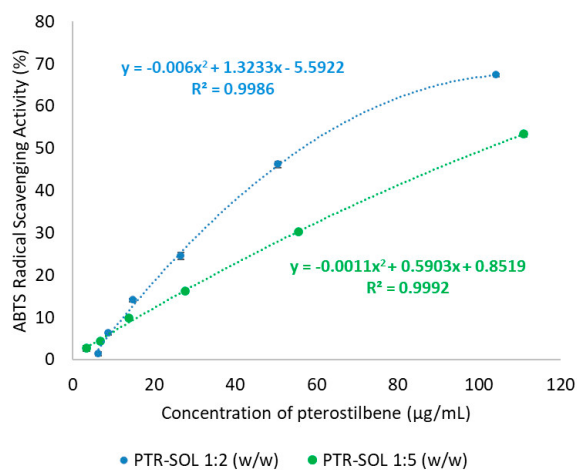

(a)

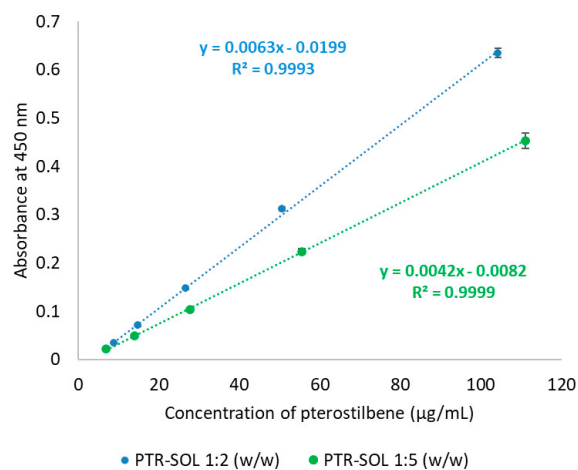

(b)

**Figure S4.** Antioxidant activity of PTR-SOL 1:2 w/w and PTR-SOL 1:5 w/w (a) ABTS radical scavenging activity in relation to the pterostilbene concentration; (b) Cupric ion ( $\text{Cu}^{2+}$ ) reducing activity in relation to the pterostilbene concentration.

**Table S1.** Selected characteristic theoretical (DFT) and experimental (EXP) bonds (in  $\text{cm}^{-1}$ ) of pterostilbene (PTR). Assignments of PTR bands made based on DFT calculations with application of 6-31G(d,p) basis set.

| Pterostilbene |      | Band assignment                                                                  |
|---------------|------|----------------------------------------------------------------------------------|
| DFT           | EXP  |                                                                                  |
| 787           | 816  | 2-CHw + CHt at benzene ring B                                                    |
| 805           | 829  | CHt at benzene ring A + 4'- and 6'-CHw                                           |
| 822           | 853  | 6-, 5'- and 6'-CHw                                                               |
| 926           | 914  | 5' and 6'-CHt                                                                    |
| 970           | 962  | CHw at main chain                                                                |
| 1066          | 1049 | C-C-Cs in benzene ring A + 2-, 4-, 6-CHb + 5-OCs                                 |
|               | 1061 |                                                                                  |
| 1092          | 1103 | 2-, 4-CHb + 3-OCs                                                                |
| 1144          | 1146 | 2- and 6-CHb                                                                     |
| 1161          | 1171 | 2'- and 5'-CHb + 4'-OHb                                                          |
| 1205          | 1200 | 3- and 5-COCas                                                                   |
|               | 1223 |                                                                                  |
| 1205          | 1265 | 2-, 4-, 6-CHb + CHb at main chain + 2'-, 3'-CHb                                  |
| 1301          | 1281 | C-C-Cb in benzene ring A                                                         |
|               | 1292 |                                                                                  |
| 1335          | 1319 | 2'- 5'-, 6'-CHb + C-C-Cas in benzene ring B + 4'-OHb                             |
| 1362          | 1354 | CHw in 3- and 5-OCH <sub>3</sub> group + def. benzene ring A + CHb at main chain |
| 1422          | 1420 | CHw in 3- and 5-OCH <sub>3</sub> group + 2-, 4-, 6-CHb                           |
| 1475          | 1458 | CHb and CHw in 3- and 5-OCH <sub>3</sub> group                                   |
| 1509          | 1514 | 2'-, 3'-, 5'- and 6'-CHb + C-C-Cs in benzene ring B                              |
| 1597          | 1584 | 2-, 4-, 6-CHb + C-C-Cas in benzene ring A                                        |
| 1614          | 1599 | C=Cs in in benzene ring B                                                        |
| 2919          | 2853 | CH <sub>3</sub> s in 5-OCH <sub>3</sub> group                                    |
| 2972          | 2942 | CH <sub>2</sub> s in 5-OCH <sub>3</sub> group                                    |
| 3041          | 3005 | CH <sub>3</sub> s in 3-OCH <sub>3</sub> group                                    |
| 3059          | 3028 | CHs at benzene ring B and at main chain                                          |
| 3694          | 3341 | 4'-OHs                                                                           |

Legend: s - stretching, t - twisting, w - wagging, def. - deformation. Carbon atom numbers and localization of benzene ring A and B were described in Figure 6a.

**Table S2.** Selected characteristic bonds (in  $\text{cm}^{-1}$ ) of pterostilbene (PTR), Soluplus® (SOL), and systems of PTR-SOL (ratio 1:2, and 1:5). Assignments of PTR bands made based on DFT calculations, and SOL based on literature.

| PTR  | SOL  | PTR-SOL<br>1:2 w/w | PTR-SOL<br>1:5 w/w | Band assignment                                                                  |
|------|------|--------------------|--------------------|----------------------------------------------------------------------------------|
| 816  |      | —                  | —                  | 2-CHw + CHt at benzene ring B                                                    |
| 829  |      | —                  | —                  | CHt at benzene ring A + 4'- ang 6'-CHw                                           |
|      | 841  | 835                | 839                | *                                                                                |
| 853  |      | —                  | —                  | 6-, 5'- and 6'-CHw                                                               |
| 914  |      | —                  | —                  | 5' and 6'-CHt                                                                    |
| 962  |      | ↓                  | —                  | CHw at main chain                                                                |
|      | 974  | —                  | ↓                  | *                                                                                |
|      | 1020 | ↓                  | ↓                  | *                                                                                |
| 1049 |      | ↓                  | —                  |                                                                                  |
| 1061 |      | 1063↓              | —                  | C-C-Cs in benzene ring A + 2-, 4-, 6-CHb + 5-OCs                                 |
| 1103 |      | ↓                  | —                  | 2-, 4-CHb + 3-OCs                                                                |
| 1146 |      | 1148↓              | 1150↓              | 2- and 6-CHb                                                                     |
| 1171 |      | ↓                  | ↓                  | 2'- and 5'-CHb + 4'-OHb                                                          |
|      | 1196 | 1200               | 1200               |                                                                                  |
| 1200 |      | —                  | —                  |                                                                                  |
| 1223 |      | —                  | —                  | 3- and 5-COCas                                                                   |
|      | 1234 | ↓                  | ↓                  | C-O-C s in the ether groups [1]                                                  |
| 1265 |      | ↓                  | —                  | 2-, 4-, 6-CHb + CHb at main chain + 2'-, 3'-CHb                                  |
| 1281 |      | ↓                  | —                  |                                                                                  |
| 1292 |      | ↓                  | —                  | C-C-Cb in benzene ring A                                                         |
| 1319 |      | —                  | —                  | 2'- 5'-, 6'-CHb + C-C-Cas in benzene ring B + 4'-OHb                             |
| 1354 |      | —                  | —                  | CHw in 3- and 5-OCH <sub>3</sub> group + def. benzene ring A + CHb at main chain |
| 1420 |      | —                  | —                  | CHw in 3- and 5-OCH <sub>3</sub> group + 2-, 4-, 6-CHb                           |
|      | 1420 | 1423               | 1422               | *                                                                                |
|      | 1437 | 1443               | 1441               | *                                                                                |
| 1458 |      | —                  | —                  | CHb and CHw in 3- and 5-OCH <sub>3</sub> group                                   |
|      | 1458 | ↓                  | ↓                  | *                                                                                |
|      | 1475 | 1477↓              | 1477↓              | C-O-C s in the ether groups [1]                                                  |
| 1514 |      | ↓                  | ↓                  | 2'-, 3'-, 5'- and 6'-CHb + C-C-Cs in benzene ring B                              |
| 1584 |      | 1586↓              | 1587↓              | 2-, 4-, 6-CHb + C-C-Cas in benzene ring A                                        |
| 1599 |      | +                  | +                  | C=Cs in in benzene ring B                                                        |
|      | 1634 | ↓                  | ↓                  | C=O stretching in tertiary amide [2,3] in the caprolactam [4] or C(O)N [5]       |
|      | 1734 | ↓                  | +                  | C=O stretching in the ester [2,3] or OC(O)CH <sub>3</sub> [5]                    |
| 2833 |      | 2837↓              | —                  | CH <sub>3</sub> s in 5-OCH <sub>3</sub> group                                    |
|      | 2859 | ↓                  | +                  | C-H stretching [3]                                                               |
|      | 2926 | 2930               | ↑                  | aliphatic -CH stretching [3]                                                     |
| 2949 |      | —                  | —                  | CH <sub>2</sub> s in 5-OCH <sub>3</sub> group                                    |
| 3005 |      | —                  | —                  | CH <sub>3</sub> s in 3-OCH <sub>3</sub> group                                    |
| 3028 |      | —                  | —                  | CHs at benzene ring B and at main chain                                          |
| 3341 |      | +                  | —                  | 4'-OHs                                                                           |
| 3370 |      | +                  | —                  |                                                                                  |

Legend: ↓ - decrease in peak intensity, ↑ - increase in peak intensity, + - a band is observed in this range, - - a band is not observed in this range, \* - no information in the literature, s - stretching, t - twisting, w - wagging, def. – deformation. Carbon atom numbers and localization of benzene ring A and B were described in Figure 6a.

**Table S3.** Validation parameters of HPLC-DAD methods for concentration determination of pterostilbene

| Pterostilbene                                      |                                                                     |
|----------------------------------------------------|---------------------------------------------------------------------|
| Parameter                                          | PTR dissolved in acetonitrile;<br>Injection volume 10 $\mu\text{L}$ |
| Linearity range ( $\text{mg}\cdot\text{mL}^{-1}$ ) | 0.002-0.0006                                                        |
| Correlation coefficient (r)                        | 1.00                                                                |
| $a \pm S_a$                                        | $16\,778\,474\,262.6 \pm 183692326.8$                               |
| $b \pm S_b$                                        | $-687\,544.89 \pm 227956.1827$ insignificant ( $\alpha=0.05$ )      |
| LOD ( $\text{mg}\cdot\text{mL}^{-1}$ )             | 0.000060                                                            |
| LOQ ( $\text{mg}\cdot\text{mL}^{-1}$ )             | 0.00020                                                             |
| Retention Time                                     | 4.275                                                               |
